# Supplementary material for: Antipsychotic Use by Medicaid-Insured Youths: Impact of Eligibility and Psychiatric Diagnosis Across a Decade
Source: Atypon-hosted journal article supplement (doi:10.1176/appi.ps.201200081), 2012-12-17
Supplement: 223_ds001.pdf [file 223_ds001.pdf]

Appendix I. Definition of Psychiatric Diagnostic Groups by the corresponding ICD-9-CM\* codes

| <b>Diagnostic group</b>                     | <b>ICD-9-CM codes</b>                                                    |
|---------------------------------------------|--------------------------------------------------------------------------|
| <b>Schizophrenia;<br/>other psychoses</b>   | 295, 297-298                                                             |
| <b>PDD<sup>1</sup>; mental retardation</b>  | 299, 317-319                                                             |
| <b>Bipolar disorder</b>                     | 296.0, 296.1, 296.4-296.8, 301.13                                        |
| <b>Disruptive disorders</b>                 | 312.0-312.4, 312.81, 312.82, 312.89, 312.9, 313.81                       |
| <b>ADHD</b>                                 | 314                                                                      |
| <b>Depressive disorders</b>                 | 293.83, 296.2, 296.3, 296.9, 298.0, 300.4, 311                           |
| <b>Anxiety disorders</b>                    | 293.84, 300.0, 300.2, 300.3, 308.3, 309.21, 309.81, 313.0, 313.2, 313.89 |
| <b>Adjustment disorder</b>                  | 308.0-308.2, 308.4, 308.9, 309.0-309.4, 309.82, 309.83, 309.89, 309.9    |
| <b>Communication and learning disorders</b> | 307.0, 307.9, 315.0-315.2, 315.31, 315.32, 315.39, 315.9                 |
| <b>Other mental disorders<sup>2</sup></b>   | 290-319 (includes only the codes not listed above)                       |

\*ICD-9-CM: International Classification of Diseases, Ninth Revision, Clinical Modification; <sup>1</sup> PDD: Pervasive Developmental Disorder; <sup>2</sup> Other mental disorders group includes the ICD-9-CM codes 290-319 not listed in any other diagnostic group.
